# Supplementary material for: A pyrene-linked thiourea as a chemosensor for cations and simple fluorescent sensor for picric acid
Source: Royal Society of Chemistry journal article supplement (doi:10.1039/c4ay02529f), 2014-12-08

## Supporting Information

Figure S1. FTIR Spectrum of R1

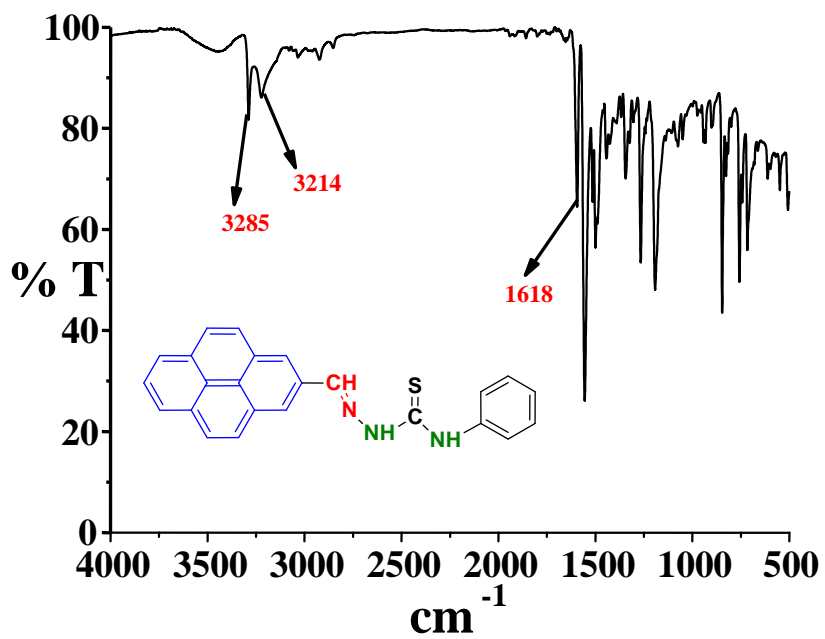

Figure S2. <sup>1</sup>H NMR Spectrum of R1

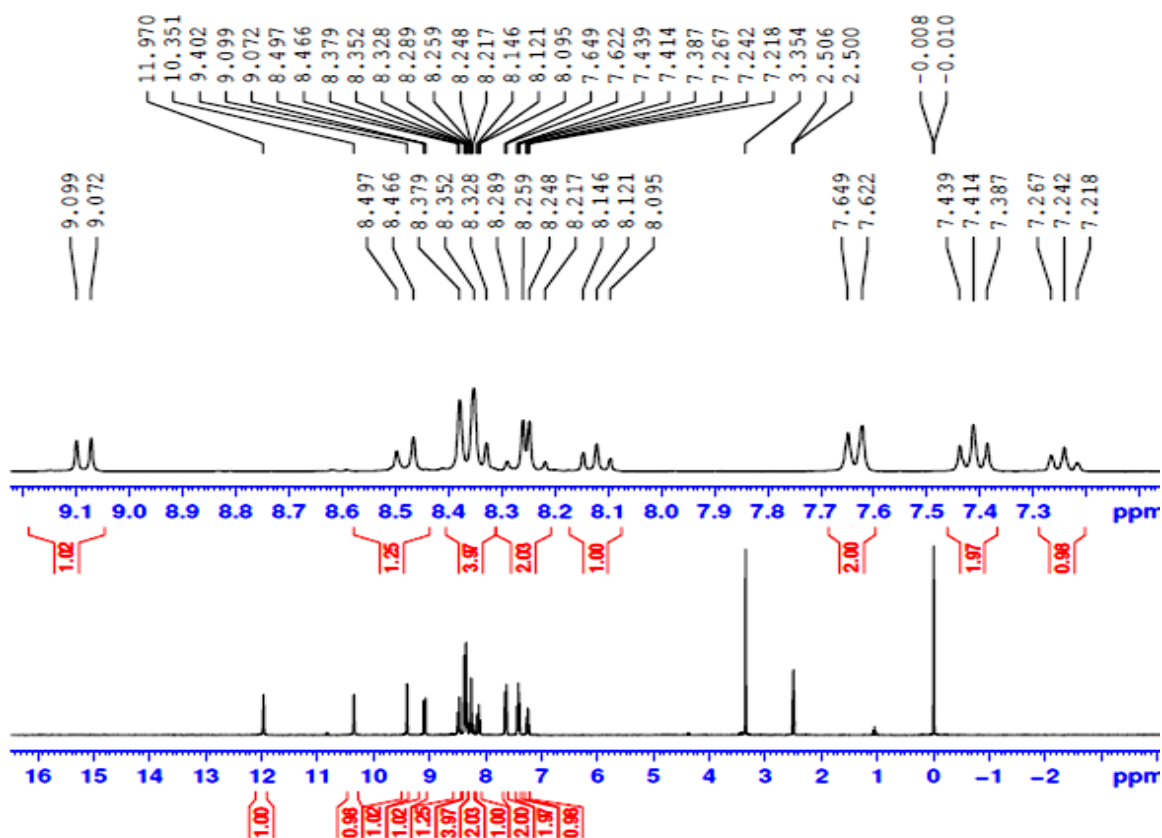

**Figure S3. ESI Mass Spectrum of R1**

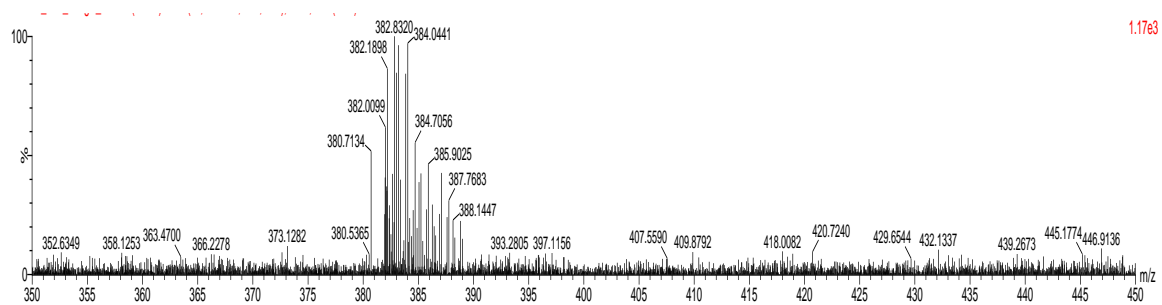

**Figure S4.** UV-vis spectrum of R1 ( $5 \times 10^{-5}$  M, in  $\text{CH}_3\text{CN}$ ) upon titration with  $\text{Hg}^{2+}$  ( $1.5 \times 10^{-3}$  M, in  $\text{CH}_3\text{CN}$ ) (Inset: Changes of absorbance upon addition of  $\text{Hg}^{2+}$  ion at 370 nm).

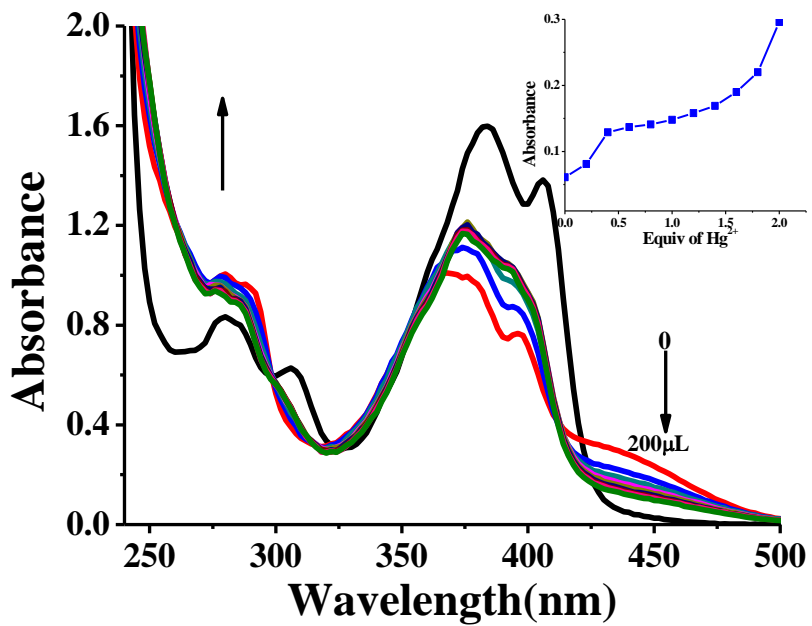

Figure S5. Job's plot of R1 with  $\text{Cu}^{2+}$  and  $\text{Hg}^{2+}$  ions

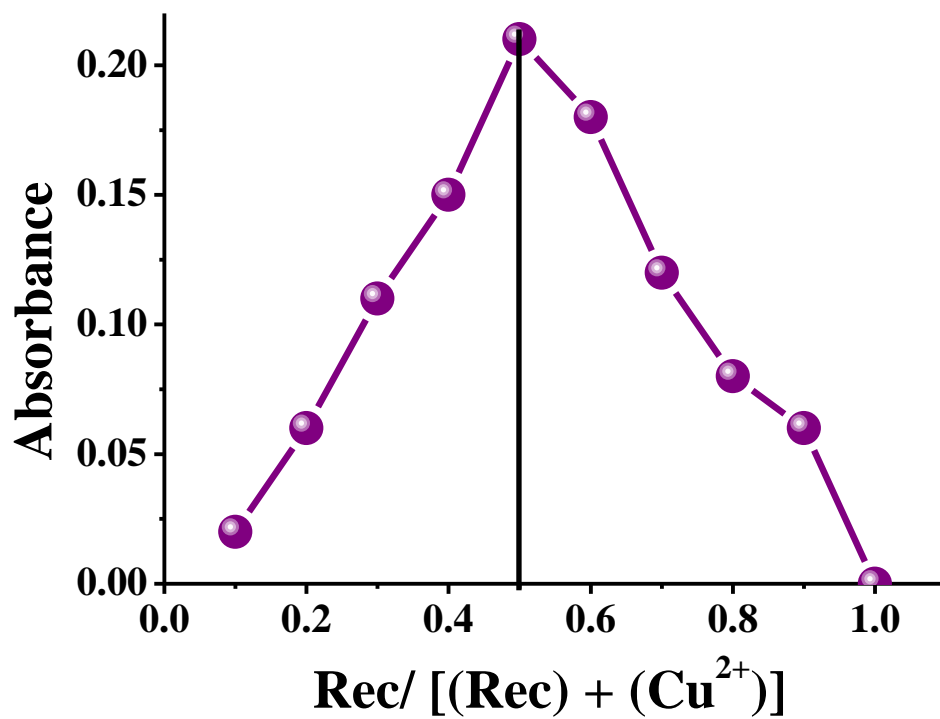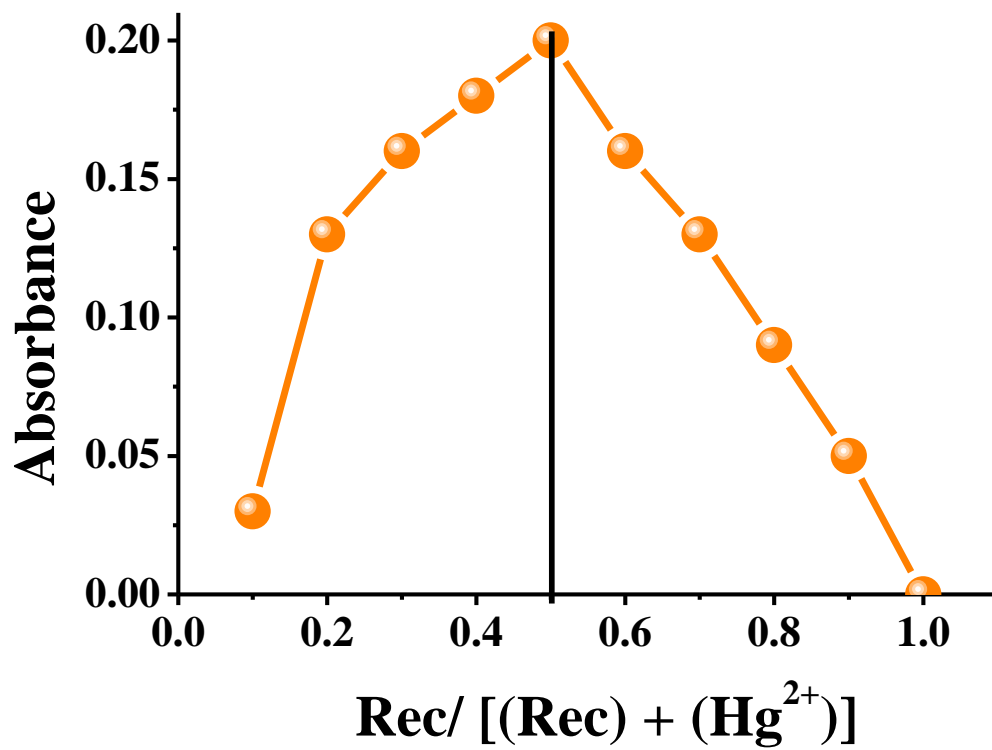

Figure S6. Job's plot of R1 with F<sup>-</sup> ions and picric acid

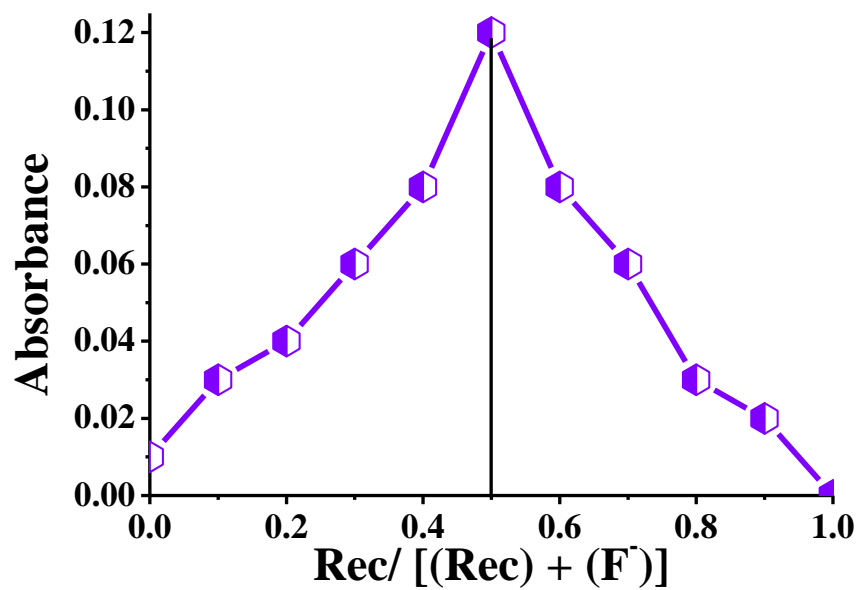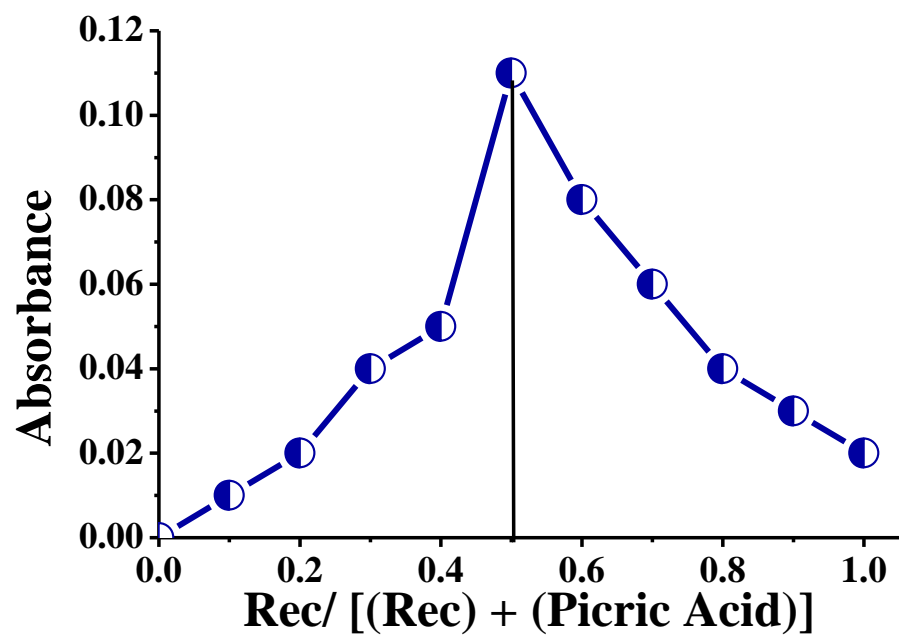

**Figure S7.** UV-vis spectra of R1 recorded in CH<sub>3</sub>CN ( $5 \times 10^{-5}$  M) on addition of Cu<sup>2+</sup> (2 equiv.) and then titration with F<sup>-</sup> (0-200 $\mu$ L)

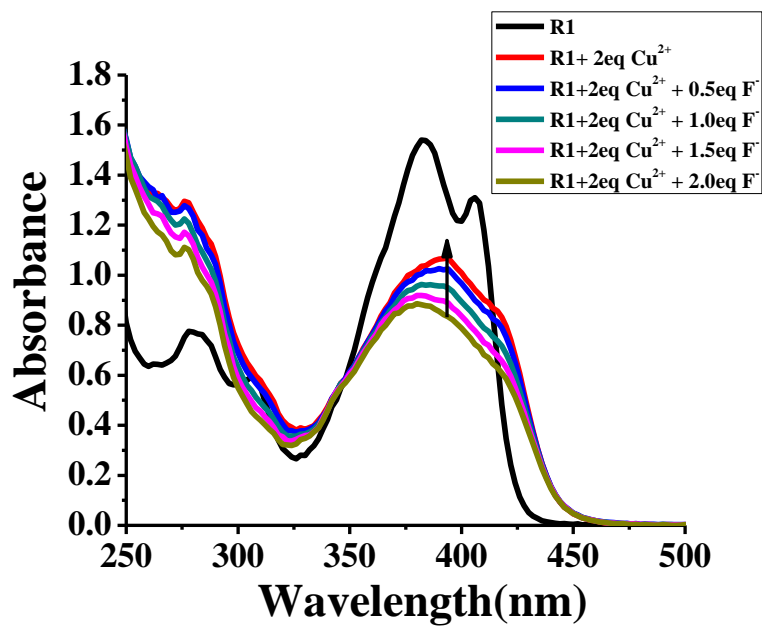

**Figure S8.** UV-vis spectra of R1 recorded in CH<sub>3</sub>CN (5 x 10<sup>-5</sup> M) on addition of F<sup>-</sup> (2 equiv.) and then titration with Cu<sup>2+</sup> (0-200μL)

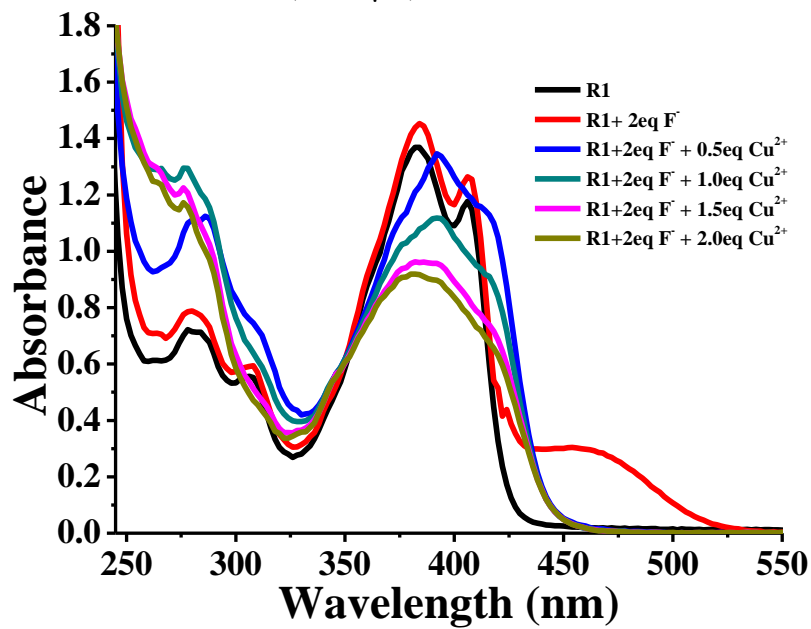



**Figure S9.** FTIR Spectrum of R1 and R1+complexes

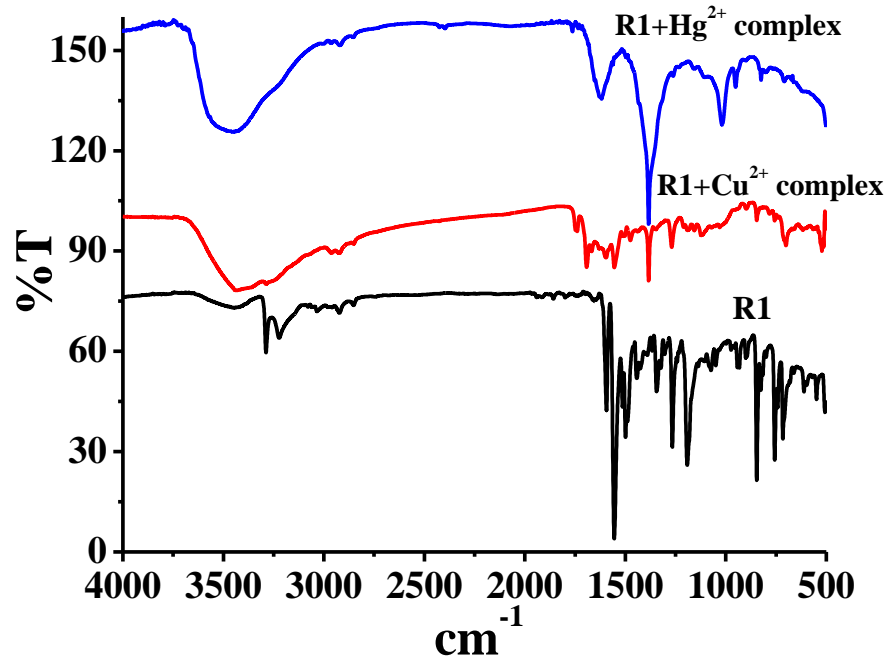

**Figure S10.**  $^1\text{H}$  NMR Spectrum of R1 and R1+complexes

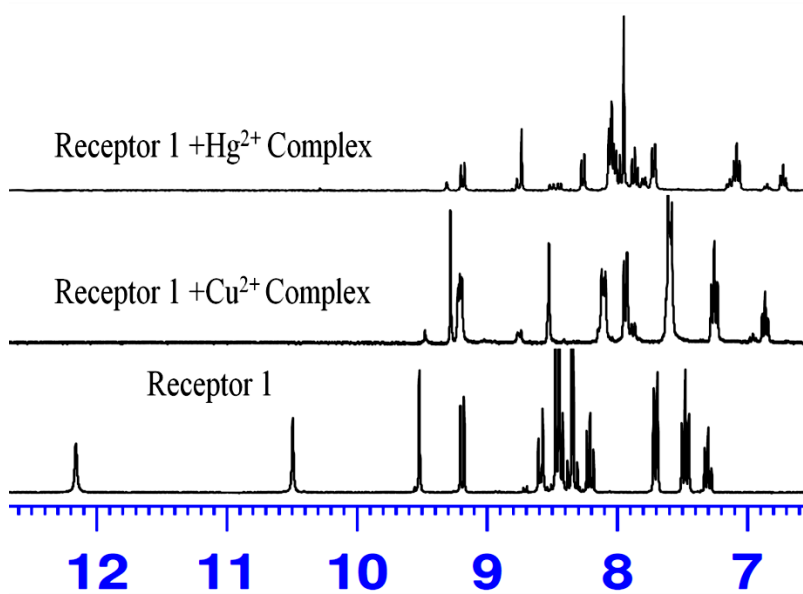

Supplement: c4ay02529f1.pdf [file c4ay02529f1.pdf]
